# Supplementary material for: From volcanic ashes to magnetic zeolites: unravelling the iron oxide phase transitions by magnetic and advanced structural characterization
Source: Royal Society of Chemistry journal article supplement (doi:10.1039/d5ta03456f), 2025-01-01
Supplement: d5ta03456f1.pdf [file d5ta03456f1.pdf]

## Supplementary information

### From Volcanic Ashes to Magnetic Zeolites: Unrevealing the Iron Oxides Phase Transitions by Magnetic and Advanced Structural Characterization

Maryam Abdolrahimi<sup>1,2</sup>, Pierfrancesco Maltoni<sup>1,2</sup>, Gianni Barucca<sup>3</sup>, Claudia Belviso<sup>4</sup>, Carlo Meneghini<sup>5</sup>, Davide Peddis<sup>1,2</sup>

<sup>1</sup>Institute of Structure of Matter, nM2-Lab, National Research Council, Monterotondo Scalo (Rome) 00015, Italy

<sup>2</sup>Department of Chemistry and Industrial Chemistry & INSTM RU, nM2-Lab, University of Genoa, Genoa 16146, Italy

<sup>3</sup>Department of Science and Engineering of Matter, Environment and Urban Planning (SIMAU), University Politecnica delle Marche, Via Brecce Bianche 12, Ancona 60131, Italy

<sup>4</sup>Istituto di Metodologie per l'Analisi Ambientale IMAA-CNR, Tito Scalo (Potenza) 85050, Italy

<sup>5</sup>Department of Sciences, University of Roma Tre, Via della Vasca Navale 84, Rome 00146, Italy

#### XRD analysis

**Figure S1** and **S2** show the XRD patterns of the samples. In particular, the *VA1H<sub>60</sub>* sample exhibited the formation of X-type zeolite, zeolite P, and sodalite, along with detectable peaks corresponding to hematite. A predominance of sodalite was observed in *VA1HM<sub>60</sub>*. The hydrothermal processing of *VA2H<sub>60</sub>* and *VA2HM<sub>60</sub>* yielded similar patterns; however, *VA2H<sub>60</sub>* displayed a higher content of hematite compared to other samples. Notably, the synthetic products derived from VA0 featured a higher proportion of X-type zeolite than the other samples. Additionally, samples incubated with seawater (*HM*) consistently exhibited halite precipitation.

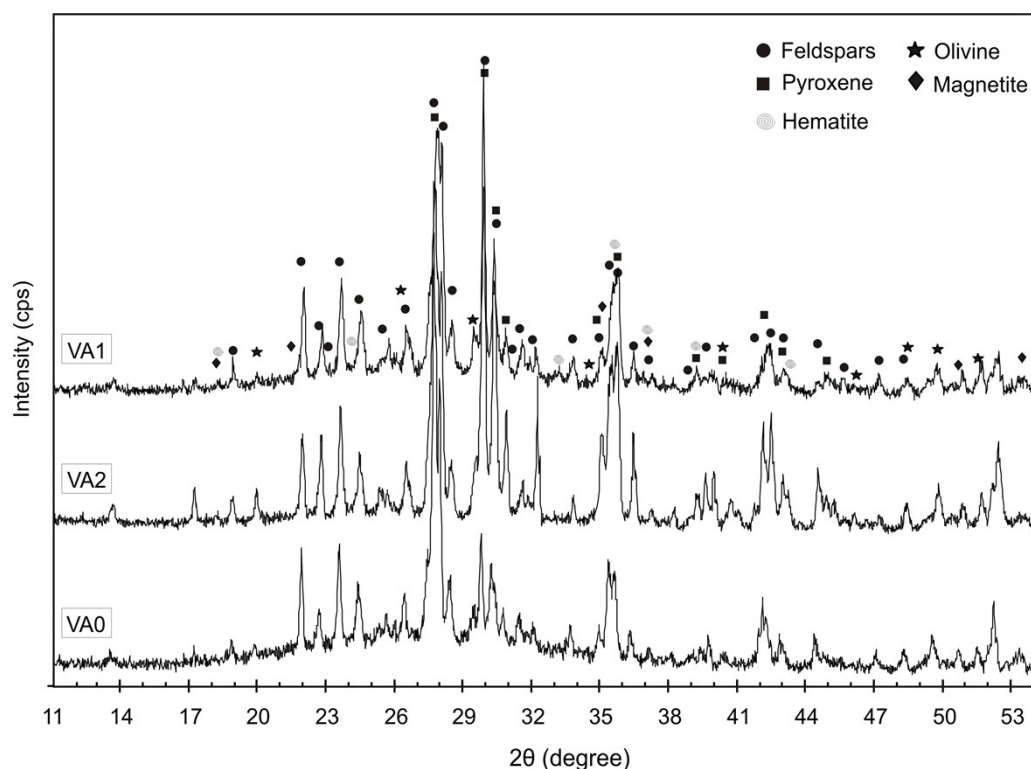

**Figure S1.** X-ray patterns of VA1 (volcanic ashes collected from Catania roads); VA2 (volcanic ash from the area of Chalet Sapienza) and VA0 (unpolluted volcanic ash sample) samples.

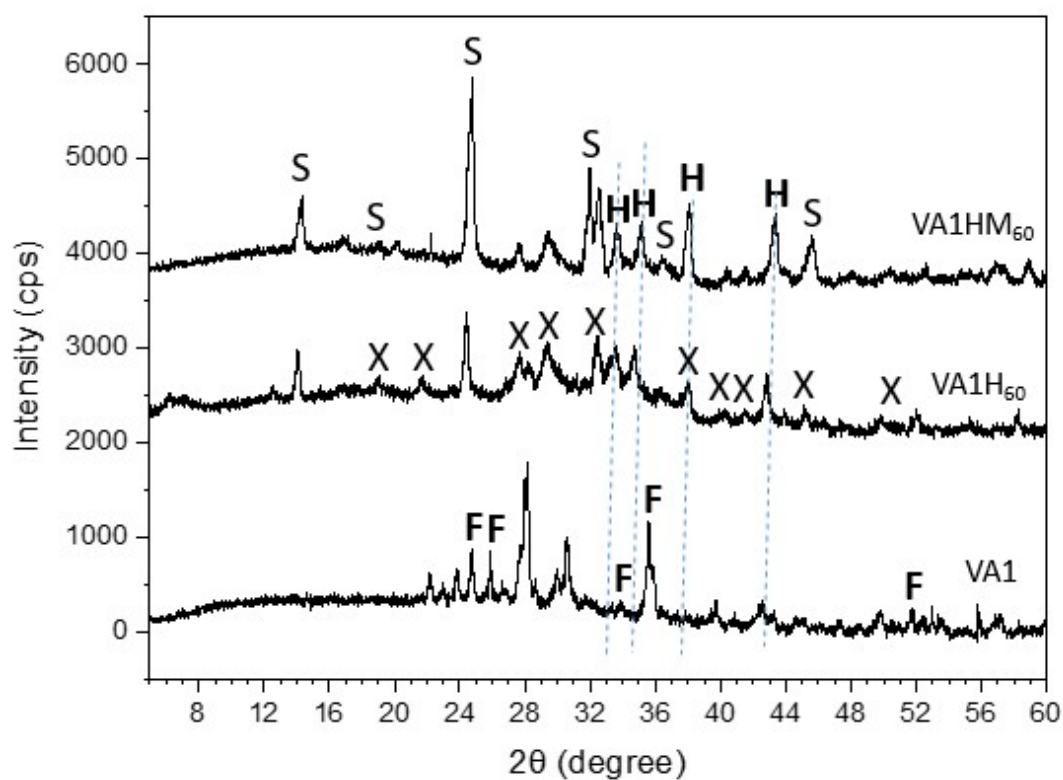

**Figure S2.** XRD patterns of volcanic ashes incubated with distilled water (H) and seawater (HM) at 60 °C. F = fayalite; H = hematite; S = sodalite; X = X-type zeolite.

### TEM analysis

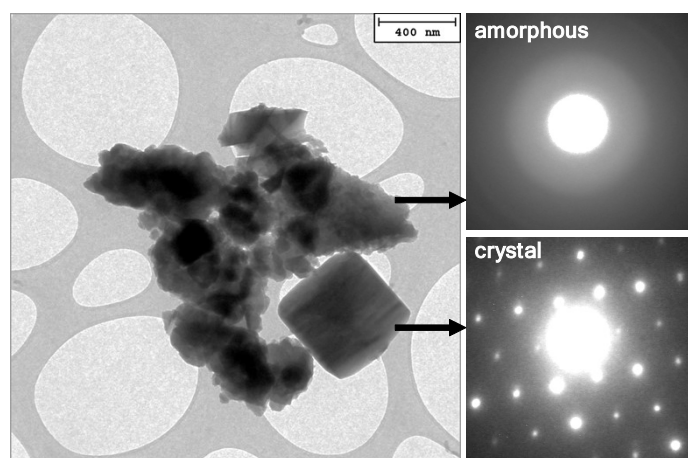

**Figure S3.** TEM bright-field image of the  $VA0HM_{60}$  sample showing both crystalline regions—characterized by a SAED pattern with regularly distributed diffraction spots—and amorphous areas, which display a SAED pattern with diffuse intensity.

### ***Additional Magnetic Characterizations***

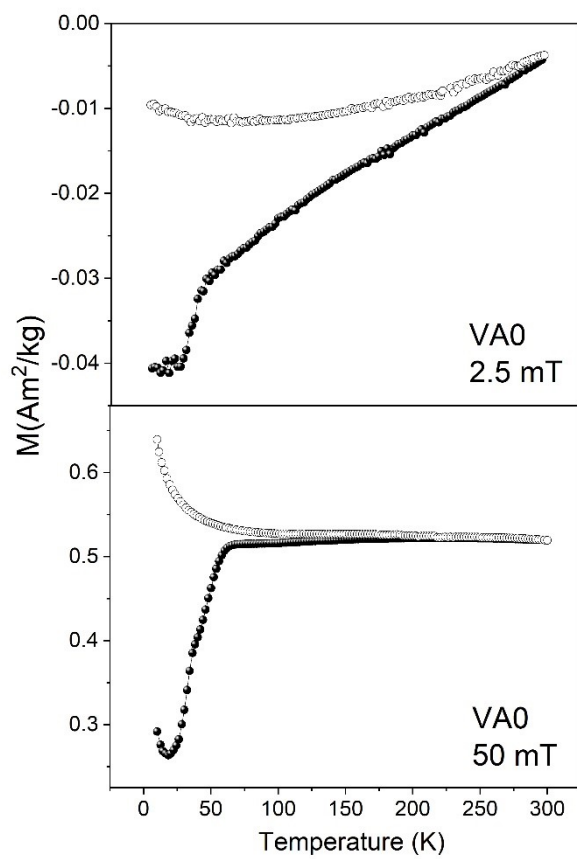

**Figure S4.** ZFC-FC curves of VA0 sample under the different applied magnetic fields.

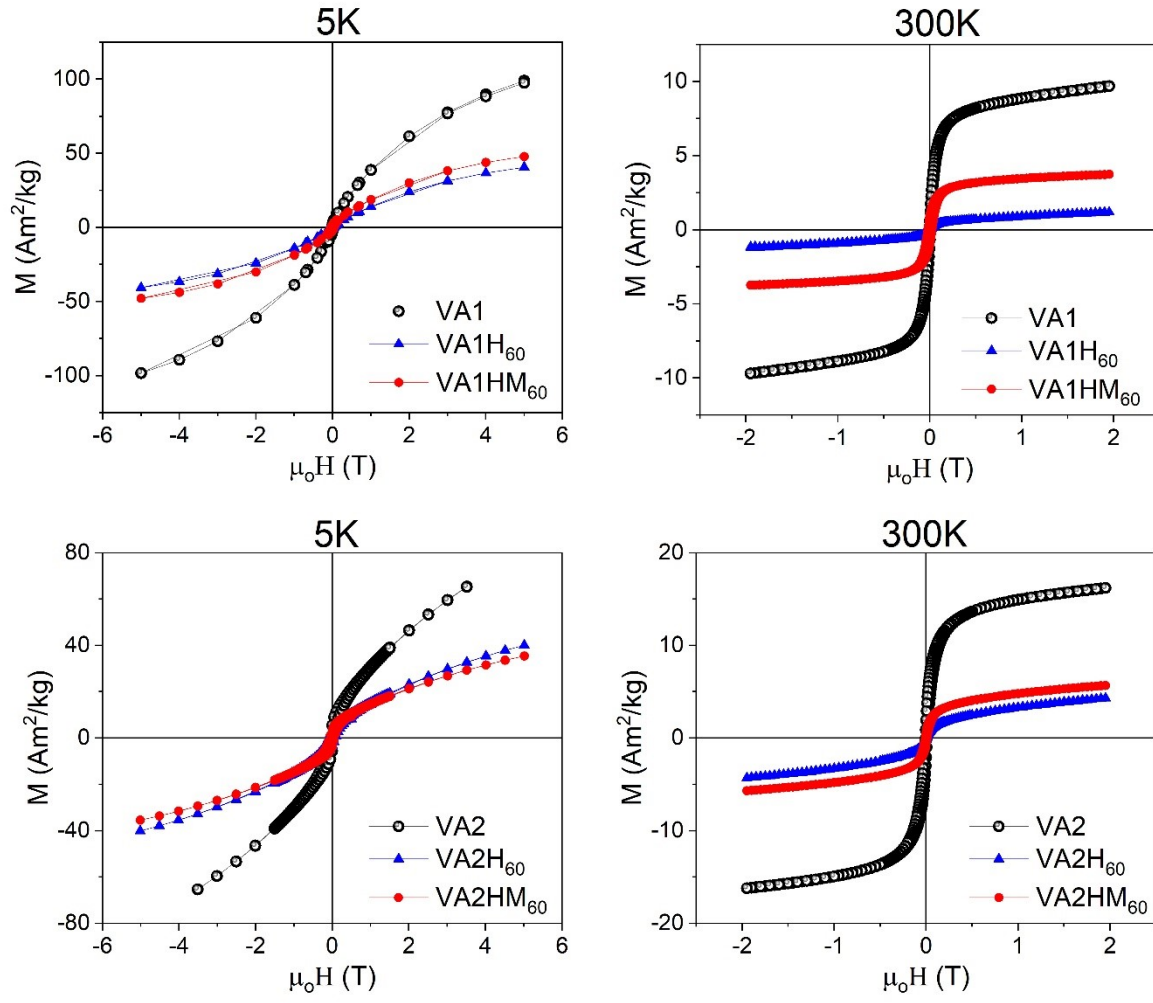

**Figure S5.** Field dependence magnetization curves at 5 K and 300 K of VA2 and VA0 series.
